# Supplementary material
Source: PubMed Central journal article supplement (PMC2919169)
Supplement: NIHMS209247-supplement-01.pdf [file NIHMS209247-supplement-01.pdf]

## **Supplemental Information**

### **Protein Kinase R Contributes to Immunity against Specific Viruses by Regulating Interferon mRNA Integrity**

**Oliver Schulz, Andreas Pichlmair, Jan Rehwinkel, Neil C. Rogers,  
Donalyn Scheuner, Hiroki Kato, Osamu Takeuchi, Shizuo Akira,  
Randal J. Kaufman, and Caetano Reis e Sousa**

## **Supplemental Information**

Figure S1, related to Figure 1  
Figure S2, related to Figure 5A-C  
Figure S3, related to Figure 5E

Supplemental Figure Legends

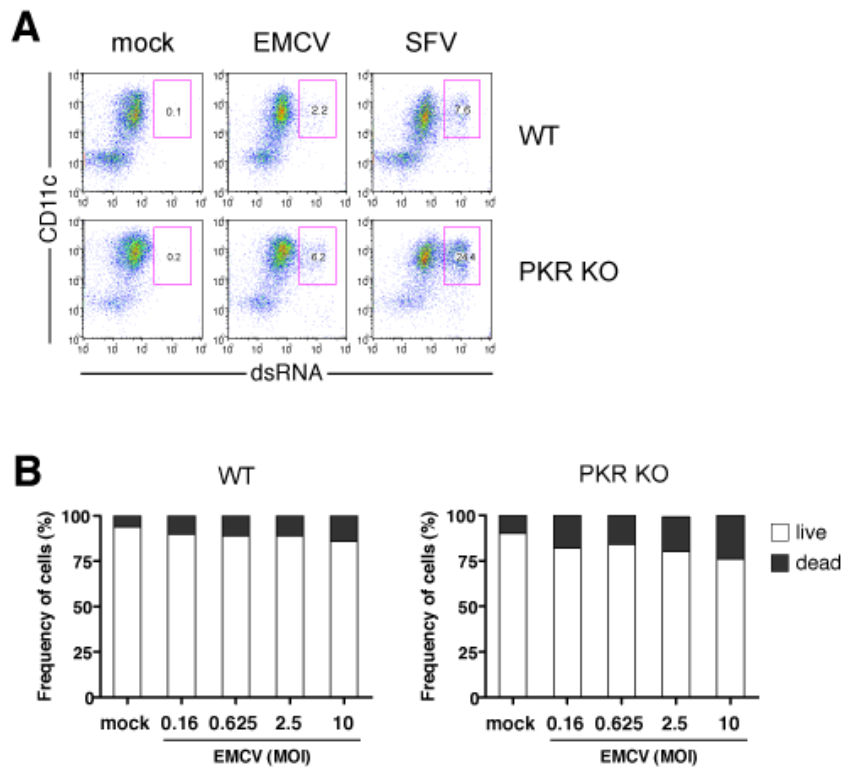

**Figure S1. Failure of  $PKR^{-/-}$  BM-DCs to produce  $IFN-\alpha/\beta$  does not correlate with reduced levels of viral RNA or increased cell death.** (A) BM-DCs were infected with EMCV (MOI=10), SFV (MOI=5) or left untreated (mock) and stained with a mAb (K1) specific for dsRNA before analysis by flow cytometry. Dot plots show cells expressing the DC lineage-specific marker CD11c and dsRNA. The frequency of CD11c/dsRNA double positive cells is shown inside the rectangular gates. (B) Wild-type (left panel) and  $PKR^{-/-}$  BM-DCs (right panel) were stained with a live/dead cell discriminating dye after overnight incubation in the absence or presence of EMCV (MOI=10) and analyzed by flow cytometry. Histogram shown represent percentage of dead cells (filled section of bar) and live cells (open section of bar) for each treatment. Data in A and B are representative of two independent experiments.

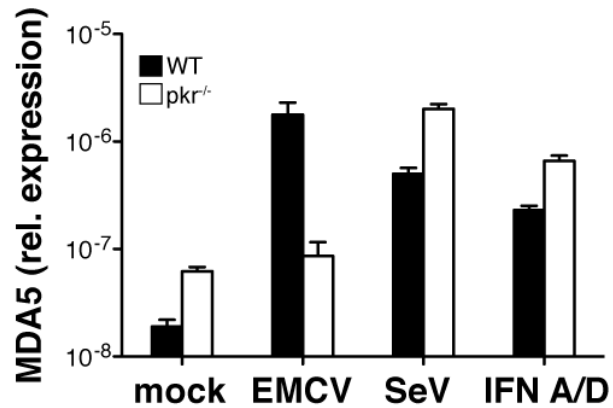

**Figure S2. PKR<sup>-/-</sup> BM-DCs fail to up-regulate MDA5 mRNA after EMCV infection.**

BM-DCs (5x10<sup>5</sup>/well) were infected with EMCV (MOI=10), SeV (MOI=1) or treated with IFN A/D for 12 hours. MDA5 mRNA was analyzed by quantitative PCR and levels were calculated relative to 18s rRNA. Data are the mean ± SD of triplicate wells and are representative of three independent experiments with similar results.

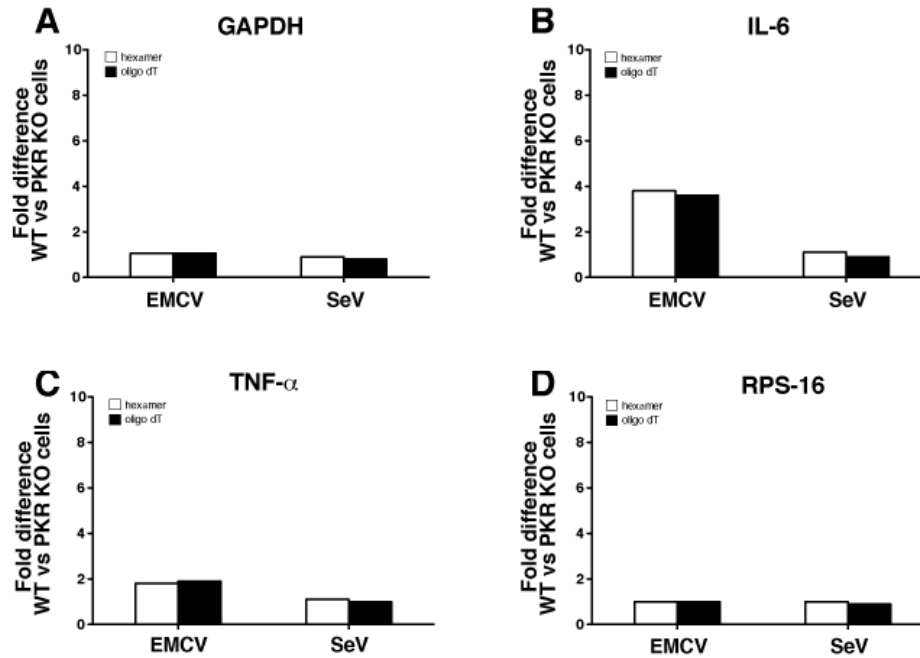

**Figure S3. Quantitative PCR analysis of adenylation status of various inducible and constitutive genes following viral infection.** BM-DCs were infected with EMCV (MOI=10) or SeV (Moi=1) for 12 hrs and 6 hrs respectively. cDNA for GAPDH (A), IL-6 (B), TNF- $\alpha$  (C), and RPS-16 (D) was generated from total RNA using random hexamer (open bars) or oligo dT (filled bars) nucleotides. The relative expression of each gene in PKR<sup>+/+</sup> versus PKR<sup>-/-</sup> cells was calculated from the Ct values and converted into fold difference using the formula  $2^{(-\Delta Ct)}$ . Data are representative of two independent experiments.
